# Supplementary material
Source: PubMed Central journal article supplement (PMC6190834)
Supplement: NIHMS989638-supplement-Suppl_1.pdf [file NIHMS989638-supplement-Suppl_1.pdf]

**OPO Solid Organ Donor Screening Practices for *Strongyloides stercoralis* Survey**

1. Page 1

**PLEASE NOTE:** You will NOT be asked all of the questions in this Survey. Depending on your answers to particular questions, the survey is designed to skip over questions that are not relevant for your OPO. Therefore the numbering on the questions on the screen will not always correspond to the numbering of the questions in the PDF file you may have received. The wording is the same, just the numbering is different.

**Do NOT** use the "forward" and "back" buttons on your browser with this survey. It will not work well.

**The initial results of this survey will be shared with the OPO Community during the AOPO Annual Meeting in Austin (2 sessions on Wednesday afternoon).**

**OPO Solid Organ Donor Screening Practices for *Strongyloides stercoralis* Survey**

**2. Page 2**

\* 1.

Please enter your identifying information here:

(Note: The OPO name and UNOS code are required.)

**Name of Person**

**Completing Survey**

**OPO Name (required)**

**4 Letter UNOS code  
(required)**

**Email Address**

**Phone Number**

\* 2. Is your OPO currently screening potential donors for *Strongyloides stercoralis* infection?

Yes

No

OPO Solid Organ Donor Screening Practices for *Strongyloides stercoralis* Survey

3. Page 3

3. For approximately how long has your OPO been screening for *Strongyloides*?

- Less than 6 months
- 6 to 12 months
- 13 to 24 months
- 25 to 36 months
- 37 to 48 months
- More than 48 months

4. What prompted the initiation of your OPO screening for *Strongyloides*? (Check all that apply)

- History of positive donor(s) from our OPO
- AST guidelines
- Recommended by a local working group/committee
- Information received/lecture provided at AOPO conference
- Other (please specify)

5. Are you screening all potential donors or are you using a risk-based screening strategy?

- All donors
- Risk-based strategy (e.g., by age, country of origin, etc.)

**OPO Solid Organ Donor Screening Practices for *Strongyloides stercoralis* Survey**

**4. Page 4**

6. If you are using a risk-based screening, please provide risk factors included in the screening criteria in the space available.

OPO Solid Organ Donor Screening Practices for *Strongyloides stercoralis* Survey

5. Page 5

7. Which laboratory are you using for *Strongyloides* donor screening?

- LabCorp
- ARUP
- Quest Diagnostics
- Other (please specify)

8. In addition to any testing performed in your laboratory, do you send samples for confirmatory testing?  
(Please specify where in comment box. E.g., CDC or name of reference laboratory)

- Always
- Sometimes
- Never

Please specify:

9. Do you wait for the results of *Strongyloides* donor screening tests before recovery of organs from donor?

- Always
- Sometimes
- Never

10. How many donors have you screened since initiation of *Strongyloides* screening?

11. How many donors have screened positive since initiation of *Strongyloides* screening?

12. Of the donors who have screened positive for *Strongyloides*, how many donors were also positive on confirmatory testing? *Please enter N/A if confirmatory testing not performed. Please enter 0 (zero) if the answer to the previous question was zero.*

\* 13. Have organs from any of your donors who screened positive for *Strongyloides* been transplanted?

- Yes
- No
- N/A - No *Strongyloides* positive donors

**OPO Solid Organ Donor Screening Practices for *Strongyloides stercoralis* Survey**

**6. Page 6**

14. From how many DONORS who screened positive for *Strongyloides* have organs been transplanted?

15. How many ORGANS from donors who screened positive for *Strongyloides* have been transplanted?

16. Which organs from donors who screened positive for *Strongyloides* have been transplanted? (Check all that apply)

- None
- Heart
- Lungs
- Kidneys
- Liver
- Pancreas
- Small Intestine
- Other (please specify)

OPO Solid Organ Donor Screening Practices for *Strongyloides stercoralis* Survey

7. Page 7

17. Did you consult a disease expert when you had a positive *Strongyloides* screening test?

- Always
- Sometimes
- Never



**OPO Solid Organ Donor Screening Practices for *Strongyloides stercoralis* Survey**

**8. Page 8**

18. Which disease expert did you consult?

- Transplant center medical expert
- Local Health Department
- State Health Department
- UNOS
- CDC
- Other (please specify)

19. When a donor is found to be positive, does your OPO provide recommendations on recipient management?

- Yes, we provide recommendations to the transplant center
- No, we leave recommendations to the discretion of the recipient transplant center

**OPO Solid Organ Donor Screening Practices for *Strongyloides stercoralis* Survey**

**9. Page 9**

20. If you do not screen for *Strongyloides* infection now, have you considered screening?

- Yes, considered screening and decided not to screen
- Yes, considered screening and have plan to start in near future
- Yes, considered screening and have not yet come to a decision
- No, have not considered screening

OPO Solid Organ Donor Screening Practices for *Strongyloides stercoralis* Survey

10. Page 10

21. If you are considering implementation of *Strongyloides* screening in the future, what prompted this decision? (Check all that apply)

- History of positive donor(s) from our OPO
- AST guidelines
- Recommended by a local working group/committee
- Information received/lecture provided at AOPO conference
- Other (please specify)

22. If you are considering implementation of *Strongyloides* screening in the future, what laboratory do you plan to use?

- LabCorp
- ARUP
- Quest Diagnostics
- Unsure/Have not decided
- Other (please specify)

23. If you are considering implementation of *Strongyloides* screening in the future, are you planning to screen all potential donors or using a risk-based screening strategy?

- All donors
- Risk-based screening

OPO Solid Organ Donor Screening Practices for *Strongyloides stercoralis* Survey

11. Page 11

24. If you are planning to use a risk-based screening, please provide risk factors that will be included in the screening criteria in the space available.

25. Do transplant centers in your DSA accept organs from donors who have tested positive for *Strongyloides*?

- Yes, all transplant centers in our DSA accept all organs
- Yes, some transplant centers in our DSA accept all organs
- Yes, those that accept organs, accept some organs and not others
- No, none of the transplant centers in our DSA accept any organs
- I do not know
- Other (please describe)

26. Please use the space below to state any hesitation with screening for *Strongyloides* or other issues/concerns related to *Strongyloides* not fully addressed in this Survey.
